# Supplementary material for: Proteomic Analysis of Salivary Secretions from the Tea Green Leafhopper, Empoasca flavescens Fabrecius
Source: MDPI journal article supplement (doi:10.3390/insects15040296), 2024-04-22
Supplement: s1 [file s1]

## Supplemental Materials

**Table S1. Primers of putative salivary secretory protein genes in RT-PCR.**

| Genes           | Forward primer sequence (5'—3') | Reverse primer sequence (5'—3') |
|-----------------|---------------------------------|---------------------------------|
| <i>Efmucin1</i> | ATGAACAATATTGAAGACCAACTTT       | TTAACTCCTAACGGTGTTCCTCTTA       |
| <i>Efmucin2</i> | ATGACGTCGCGATGGCTCGTGTT         | GGGCTGTCCTGGTTGGCCGGGTTG        |
| <i>EfE3UPL</i>  | ATGCTGCCGCAAGGCTCTCACCTC        | TCAGTCGTCGTCTGAGGCCACGTC        |
| <i>EfVDCC</i>   | ATGAGCGCCACCAACAACAACATCA       | CTATAAGTGTGGGTGCTCCCCCT         |
| <i>EfP5CR</i>   | ATGTCTGCTGTTCTAGTGGAAC          | TCATTTGCTGCCTAGTTCAA            |
| <i>EfelF3</i>   | ATGGAGCGTCTGCTGGTGGAGTGC        | ACGGTCCCTGTCGTCGGCGGGTG         |
| <i>EfTTP</i>    | ATGGCTTTGAAAGGTCCGAACCTG        | TCAATCTATCGCAAGTTTTCTGA         |
| <i>EfCCDC</i>   | ATGAGGTTTTTTTTGAGTCTAGCG        | TTAAAGAGCTTTGACCTTCAGT          |
| <i>EfLRP</i>    | ATGAAACTGAGAAAGCACCTGCTC        | ATGAGCAAACATTTCTAATTCAG         |
| <i>EfMME</i>    | ATGACCACCTCGCAAACAGTCATC        | CTACCAGACTTGACATTTT             |
| <i>EfNUP</i>    | ATGAATCATATTTACATAGGG           | TTATTTTGGTCGTCTCCTGAG           |
| <i>EfRGN</i>    | TCTTGGAGAAGGTCCTTA              | CGCTTGTTGCTCCTTGGT              |
| <i>EfVg1</i>    | ATGGCGGCCATGTGGACCTCACTGC       | GCCGGTGCTGTCTCGGCCGACAG         |
| <i>EfVg2</i>    | ATGGCTCAACCTTCTTCTTCTTC         | TTAGGCCTTGCAGGACTCGGGC          |
| <i>EfOBP1</i>   | ATGACTTGCAAGCTGACCATCTT         | TTAGTCCTTGAGGTGAATG             |
| <i>EfOBP2</i>   | ATGGTGACCAACATGGACAC            | TCATGCTGAACCGAGGCCA             |
| <i>EfOBP3</i>   | ATGAACTCCTTCGTCGCCG             | TGAGTGCGCGCTCCTCGAT             |
| <i>EfUP1</i>    | ATGTACCAATATAAGAGTAGTCTG        | GGCTGGAAGTGGCTGCGGGGC           |
| <i>EfUP2</i>    | ATGGGAACTGGCAGCAAAATGAAT        | CTAGAACCTCTTGACCTTGA            |
| <i>EfUP3</i>    | ATGGTTGTTGGAGCATTTC             | CTAAGAACAATTCTCACTTA            |

**Table S2. Primers of putative salivary secretory protein genes in qRT-PCR.**

| Genes            | Forward primer sequence (5'—3') | Reverse primer sequence (5'—3') |
|------------------|---------------------------------|---------------------------------|
| <i>Efmucin1</i>  | GTCAATACTTGCGGTGCCC             | GCGTGGTCTTTGCTCGGT              |
| <i>Efmucin2</i>  | GCTCCTTTGTGCGACTCTACT           | CTTGATTCTGCGGATGATTG            |
| <i>EfE3UPL</i>   | AAGCCATCAATGCTATCGG             | GTCACTCTGTTTCATCTGCCTCT         |
| <i>EfVDCC</i>    | GCTATCGCTGTAGACAACCTG           | ACCCTCCATCACTTCCAACCT           |
| <i>EfP5CR</i>    | ACTCGGGATGAAACCACAA             | GCCCCAACCATGATAGGA              |
| <i>EfelF3</i>    | GGAGTGCGTGCGTCATAA              | GTTCAACCATTTGCTGCTTCT           |
| <i>EfTTP</i>     | CTGGTGCGTCAGTGTCGG              | TCTTTTCAGTCGTTGAGGGTATG         |
| <i>EfCCDC</i>    | CGGACTCGCAGTACACGC              | GCCATATCTTTGCTCAGCCT            |
| <i>EfLRP</i>     | CTGCCTCGCCAACTAAT               | TTTCCAACCGACCTTTCG              |
| <i>EfMME</i>     | GAAGTGGTGGGCTCCTGA              | GCTTGATCCCTCCGTTATCT            |
| <i>EfNUP</i>     | TGATTGTAAAGCCAGCAGATAC          | CGATTTTCCTTAGGTGGTGAG           |
| <i>EfRGN</i>     | TGAGGGAATGCTCTGGGTA             | GCTTGTTGCTCCTTGGTGA             |
| <i>EfVg1</i>     | AGCGATGCCAGGAAACAC              | TTGGGGAGGACAGACAGAAG            |
| <i>EfVg2</i>     | GTCGCTCCCTTGTTGTG               | CTCGTCATCGTCGTCTTCAT            |
| <i>EfOBP1</i>    | TCTGGTCGAGTGCATGTTAG            | CCTTGAGGTGAATGTTTTGC            |
| <i>EfOBP2</i>    | TGCAACTGATGATGAACTGTCA          | CCACTTTCTTCGCCTTGACT            |
| <i>EfOBP3</i>    | CCGTCGTCCTGGCTCTAG              | TTCCTTCGGGTGTCGTTG              |
| <i>EfUP1</i>     | GGACAACGCTCCTCCTACG             | CCTGCAACGCATCCATCT              |
| <i>EfUP2</i>     | CCAAGCGTCAACATCATTCC            | TCATTAACAGTTCCAGGCAAA           |
| <i>EfUP3</i>     | ATGTGGGTGATGAACTTGGG            | CCTTTGCCGTTTCCTTGC              |
| <i>EfTubulin</i> | GTGGTGCCAGGAGGTGACTT            | ACCCTCTCCGACGTACCAGT            |
| <i>EfActin</i>   | ATGTGTGACGACGACGTAGCC           | TTAGAAGCACTTCTGTGGACG           |

**Table S3. Summary of the proteins of the watery saliva of tea green leafhopper identified by LC-MS/MS.**

| Protein ID | Protein Name                                         | No. of unique peptides | Protein domain                                                                  | THMH | TargetP   | Signal P | Function group        |
|------------|------------------------------------------------------|------------------------|---------------------------------------------------------------------------------|------|-----------|----------|-----------------------|
| A0A1B6EIE9 | Eukaryotic translation initiation factor 3 subunit A | 3                      | eIF-3 subunit A family                                                          | 0    | nucl      | No       | RNA binding           |
| A0A1B6LSJ9 | Uncharacterized protein                              | 2                      |                                                                                 | 0    | nucl      | No       |                       |
| A0A1B6M6J1 | Gp_dh_N domain-containing protein                    | 2                      | GAPDH, Gp_dh_N, NAD binding domain                                              | 0    | cyto      | No       | Oxidoreductases       |
| A0A1B6EU18 | Uncharacterized protein                              | 2                      | HSP70, heat shock protein 70 family                                             | 0    | cyto      | No       | Heat shock protein    |
| A0A1S5VZC4 | Heat shock protein cognate 70-5                      | 2                      | HSP70, heat shock protein 70 family                                             | 0    | cyto      | No       | Heat shock protein    |
| A0A1B6DRM1 | Uncharacterized protein                              | 2                      | InaF-motif                                                                      | 1    | plas      | No       |                       |
| A0A482X3G0 | Gp_dh_N domain-containing protein                    | 2                      | GAPDH, Gp_dh_N, NAD binding domain                                              | 0    | cyto      | No       | Oxidoreductases       |
| A0A482WVW1 | Uncharacterized protein                              | 1                      |                                                                                 | 0    | plas      | Yes      |                       |
| A0A1B6D700 | Uncharacterized protein                              | 1                      | RNA recognition motif. (a.k.a. RRM, RBD, or RNP domain)                         | 0    | nucl      | No       | RNA binding           |
| A0A482X8K2 | Uncharacterized protein                              | 1                      | RMI1_N, SMN, UBA                                                                | 0    | cyto_nucl | No       | RNA binding           |
| A0A1B6HS38 | Uncharacterized protein                              | 1                      |                                                                                 | 0    | nucl      | No       |                       |
| A0A482XN14 | Uncharacterized protein                              | 1                      | LUC7L2_1 protein                                                                | 0    | nucl      | No       | RNA binding           |
| A0A1B6KNC8 | Uncharacterized protein                              | 1                      |                                                                                 | 0    | extr      | Yes      |                       |
| A0A482X335 | Uncharacterized protein                              | 1                      |                                                                                 | 0    | cyto_nucl | No       |                       |
| A0A1B6FHX7 | Uncharacterized protein                              | 1                      |                                                                                 | 2    | plas      | Yes      |                       |
| A0A1B6D9B6 | Uncharacterized protein                              | 1                      | Sodium channel and clathrin linker 1 (SCLT1/CAP-1A)                             | 0    | cyto      | No       | Ion transport protein |
| A0A1B6DWP9 | Protein kinase domain-containing protein             | 1                      | Protein kinase                                                                  | 0    | cyto      | No       | Ion transport protein |
| A0A482WFC3 | Uncharacterized protein                              | 1                      | Middle domain of eukaryotic initiation factor 4G (eIF4G), EIF-W2 protein domain | 0    | cyto_nucl | No       | RNA binding           |
| A0A482XT43 | BTB domain-containing protein                        | 1                      | Potassium channel tetramerisation domain, BTB/POZ domain                        | 0    | nucl      | No       | Ion transport protein |
| A0A1B6L8R3 | Reverse transcriptase                                | 1                      | reverse transcriptase (RT)                                                      | 0    | cyto      | No       |                       |

|            |                                                                                       |   |                                                                   |   |      |     |                                       |
|------------|---------------------------------------------------------------------------------------|---|-------------------------------------------------------------------|---|------|-----|---------------------------------------|
| A0A1B6C1M1 | domain-containing protein<br>Mediator of RNA polymerase II<br>transcription subunit 1 | 1 | Mediator complex subunit 1 family                                 | 0 | nucl | No  | Transcriptional<br>regulatory protein |
| A0A1B6CWA4 | TPR_REGION domain-containing<br>protein                                               | 1 | Tetratricopeptide-like helical domain<br>superfamily              | 0 | cyto | No  | protein binding                       |
| A0A1B6EK47 | Rho-GAP domain-containing<br>protein                                                  | 1 | Rho GTPase-activating protein domain                              | 0 | nucl | No  | Signal transduction<br>protein        |
| A0A1B6F459 | Elongation factor Tu                                                                  | 1 | Elongation factor Tu GTP binding<br>domain                        | 0 | mito | No  | Transcriptional<br>regulatory protein |
| A0A482XE38 | Uncharacterized protein                                                               | 1 |                                                                   | 0 | extr | No  |                                       |
| A0A1B6D1L2 | Uncharacterized protein                                                               | 1 | Mediator of CRAC channel activity,<br>Orai-1                      | 3 | plas | No  |                                       |
| A0A1B6DRQ7 | Uncharacterized protein                                                               | 1 |                                                                   | 1 | plas | No  |                                       |
| A0A482X4D7 | RUN domain-containing protein                                                         | 1 | RUN domain superfamily                                            | 0 | nucl | No  |                                       |
| A0A482XJ86 | Uncharacterized protein                                                               | 1 | Integrin-alpha FG-GAP<br>repeat-containing protein 2 (ITFG2)      | 0 | cyto | No  |                                       |
| A0A1B6CYC8 | Uncharacterized protein                                                               | 1 | Domain of unknown function<br>(DUF4487)                           | 0 | plas | No  |                                       |
| A0A1B6DW74 | Uncharacterized protein                                                               | 1 |                                                                   | 0 | mito | No  |                                       |
| A0A1B6IM19 | Uncharacterized protein                                                               | 1 |                                                                   | 0 | cyto | No  |                                       |
| A0A482XGQ6 | Uncharacterized protein                                                               | 1 | SART-1 family                                                     | 0 | nucl | No  | Transcriptional<br>regulatory protein |
| A0A1B6CKQ7 | Uncharacterized protein                                                               | 1 | Zinc finger, RING/FYVE/PHD-type                                   | 0 | cyto | No  | DNA binding                           |
| A0A1B6CUK3 | Pescadillo homolog                                                                    | 1 | Regulator of Ty1 transposition protein<br>107, BRCT domain        | 0 | cyto | No  | RNA binding                           |
| A0A1B6CY97 | Dolichyl-diphosphooligosaccharid<br>e--protein glycosyltransferase<br>subunit 2       | 1 | Oligosaccharyltransferase subunit<br>Ribophorin II                | 3 | plas | Yes | Protein transporter                   |
| A0A1B6DX26 | Sec3-PIP2_bind<br>domain-containing protein                                           | 1 | Exocyst complex component Sec3,<br>PIP2-binding N-terminal domain | 0 | cyto | No  | Vacuolar transporter                  |
| A0A1B6EVI0 | Uncharacterized protein                                                               | 1 | Zinc finger C2H2-type                                             | 0 | nucl | No  | nucleic acid binding                  |
| A0A1B6EXC8 | Proteasome subunit beta                                                               | 1 | Proteasome beta-type subunit,<br>conserved site                   | 0 | cyto | No  | Peptidases                            |
| A0A1B6FN75 | Uncharacterized protein                                                               | 1 | HSP60, heat shock protein 60 family                               | 0 | cyto | No  | Heat shock protein                    |

|            |                                          |   |                                                                              |    |           |     |                                    |
|------------|------------------------------------------|---|------------------------------------------------------------------------------|----|-----------|-----|------------------------------------|
| A0A1B6F247 | FERM domain-containing protein           | 1 | FERM domain (F for 4.1 protein, E for ezrin, R for radixin and M for moesin) | 0  | mito      | No  | molecular biology                  |
| A0A1B6FUL5 | Ubiquitin-like domain-containing protein | 1 | Ubiquitin family                                                             | n0 | cyto      | No  | Ubiquitin                          |
| A0A1B6GHV6 | Uncharacterized protein                  | 1 | HSP60, heat shock protein 60 family                                          | 0  | cyto      | No  | Heat shock protei                  |
| A0A1B6IZ35 | Uncharacterized protein                  | 1 |                                                                              | 0  | cyto_nucl | No  |                                    |
| A0A1B6K4K8 | Uncharacterized protein                  | 1 | Neurotransmitter-gated ion-channel ligand binding domain                     | 4  | plas      | Yes | Ion transport protein              |
| A0A1B6KEM3 | Uncharacterized protein                  | 1 | Carnitine deficiency-associated protein 3                                    | 0  | cyto      | No  | Unknown                            |
| A0A1B6KUR1 | PEHE domain-containing protein           | 1 | PEHE domain                                                                  | 0  | nucl      | No  | Transcriptional regulatory protein |
| A0A1B6KWK7 | H15 domain-containing protein            | 1 | Linker histone H1/H5, domain H15                                             | 0  | nucl      | No  | DNA binding                        |
| A0A482WRC5 | Uncharacterized protein                  | 1 | Kinesin motor domain superfamily                                             | 0  | nucl      | No  | Cytoskeleton protein               |
| A0A482XHM6 | Uncharacterized protein                  | 1 |                                                                              | 0  | mito      | Yes |                                    |
| A0A482XJ52 | Uncharacterized protein                  | 1 | Signal peptide, PRO_5019777043                                               | 0  | extr      | Yes | Signal peptide                     |
| A0A0A1GY74 | Vitellogenin                             | 1 | Vitellogenin#N-terminal lipid transport domain                               | 0  | extr      | Yes | lipid transporter                  |
| A0A125RA07 | Actin                                    | 1 | Actin                                                                        | 0  | cysk      | No  | Cytoskeleton protein               |
| A0A1B6C224 | RRM domain-containing protein            | 1 | RNA recognition motif domain                                                 | 0  | nucl      | No  | RNA binding                        |
| A0A1B6C2K7 | Uncharacterized protein                  | 1 | Endonuclease/exonuclease/phosphatas e                                        | 0  | nucl      | No  | nucleic acid binding               |
| A0A1B6CBL8 | Uncharacterized protein                  | 1 | Signal peptide, PRO_5008580268                                               | 0  | extr      | Yes | Signal peptide                     |
| A0A1B6CIJ1 | Integrase_H2C2 domain-containing protein | 1 | Integrase zinc-binding domain                                                | 0  | mito      | No  | nucleic acid binding               |
| A0A1B6CHQ6 | Uncharacterized protein                  | 1 | ABC transporter, ATP-Binding Cassette (ABC) superfamily                      | 0  | cyto      | No  | ABC transporter                    |
| A0A1B6CRT5 | Uncharacterized protein                  | 1 | Helicase superfamily 1/2, ATP-binding domain                                 | 0  | cyto      | No  | Transcriptional regulatory protein |
| A0A1B6CV32 | Uncharacterized protein                  | 1 | Cys/Met metabolism PLP-dependent enzyme family                               | 0  | cyto      | No  | Transferases                       |
| A0A1B6CV99 | Uncharacterized protein                  | 1 | Protein of unknown function                                                  | 0  | extr      | Yes | Signal peptide                     |
| A0A1B6CX30 | RAWUL domain-containing protein          | 1 | RAWUL domain RING finger- and WD40-associated ubiquitin-like                 | 0  | nucl      | No  | Ubiquitin                          |

|            |                                                     |   |                                                        |   |           |     |                                    |
|------------|-----------------------------------------------------|---|--------------------------------------------------------|---|-----------|-----|------------------------------------|
| A0A1B6D4A8 | Uncharacterized protein                             | 1 |                                                        | 0 | cyto_nucl | No  |                                    |
| A0A1B6D6U9 | Uncharacterized protein                             | 1 |                                                        | 0 | nucl      | No  |                                    |
| A0A1B6D6X4 | Uncharacterized protein                             | 1 | S-adenosyl-L-methionine-dependent methyltransferase    | 0 | plas      | Yes | Transferases                       |
| A0A1B6D8E8 | Pyrroline-5-carboxylate reductase                   | 1 | Pyrroline-5-carboxylate reductase, dimerisation domain | 0 | cyto      | Yes | Oxidoreductase                     |
| A0A1B6DBC7 | Uncharacterized protein                             | 1 | High mobility group box domain superfamily             | 0 | mito      | No  | DNA binding                        |
| A0A1B6DEE5 | DNA ligase                                          | 1 | DNA ligase, ATP-dependent                              | 0 | nucl      | No  | Ligase                             |
| A0A1B6DK89 | BZIP domain-containing protein                      | 1 | Basic Leucine Zipper Domain (bZIP domain)              | 0 | nucl      | No  |                                    |
| A0A1B6DP13 | Ribosomal_L16 domain-containing protein             | 1 | Ribosomal protein L16p/L10e                            | 0 | nucl      | No  | Ribosomal protein                  |
| A0A1B6E485 | IPPC domain-containing protein                      | 1 | Inositol polyphosphate-related phosphatase             | 0 | cyto      | No  | phosphatase                        |
| A0A1B6EBZ4 | Uncharacterized protein                             | 1 | Zinc finger, CXXC-type                                 | 0 | nucl      | No  | nucleic acid binding               |
| A0A1B6ENL3 | Cyclic nucleotide-binding domain-containing protein | 1 | Cyclic nucleotide-binding domain                       | 0 | nucl      | No  | nucleic acid binding               |
| A0A1B6EWL3 | SAP domain-containing protein                       | 1 | SAP domain                                             | 0 | nucl      | No  | Transcriptional regulatory protein |
| A0A1B6F0Q0 | HTH psq-type domain-containing protein              | 1 | helix-turn-helix (HTH) psq-type domain                 | 0 | cyto      | No  | DNA binding                        |
| A0A1B6F210 | Uncharacterized protein                             | 1 | HSP60, heat shock protein 60 family                    | 0 | mito      | No  | Heat shock protein                 |
| A0A1B6F2T3 | OB_NTP_bind domain-containing protein               | 1 | Oligonucleotide/oligosaccharide-binding (OB)-fold      | 0 | extr      | No  | nucleic acid binding               |
| A0A1B6FGQ7 | RING-type domain-containing protein                 | 1 | Zinc finger, RING-type                                 | 0 | nucl      | No  | nucleic acid binding               |
| A0A1B6FKR6 | Uncharacterized protein                             | 1 |                                                        | 0 | nucl      | No  |                                    |
| A0A1B6FMQ0 | Uncharacterized protein                             | 1 | Six-bladed beta-propeller, TolB-like                   | 1 | plas      | Yes | Transmembrane protein              |
| A0A1B6FUZ7 | Uncharacterized protein                             | 1 |                                                        | 0 | plas      | No  |                                    |
| A0A1B6FX17 | Uncharacterized protein                             | 1 | Putative sperm flagellar membrane protein              | 1 | plas      | No  | Transmembrane                      |
| A0A1B6G3M1 | Uncharacterized protein                             | 1 | Helicase superfamily 1/2, ATP-binding                  | 0 | cyto      | No  | Helicase                           |

|            |                                             |   |                                             |   |           |     |                                |
|------------|---------------------------------------------|---|---------------------------------------------|---|-----------|-----|--------------------------------|
| A0A1B6G9X0 | Uncharacterized protein                     | 1 | domain                                      | 0 | mito      | No  |                                |
| A0A1B6GB27 | Carboxylic ester hydrolase                  | 1 | Carboxylesterase, type B                    | 0 | plas      | No  | hydrolase                      |
| A0A1B6GEQ5 | Uncharacterized protein                     | 1 |                                             | 0 | nucl      | No  |                                |
| A0A1B6GW14 | Uncharacterized protein                     | 1 | AH/BAR domain superfamily                   | 0 | nucl      | No  | Protein binding                |
| A0A1B6GYZ2 | Uncharacterized protein                     | 1 | Centriolar coiled-coil protein of<br>110kDa | 0 | nucl      | No  | Cytoskeleton                   |
| A0A1B6H242 | Uncharacterized protein                     | 1 |                                             | 0 | cyto_nucl | No  |                                |
| A0A1B6H6M2 | Uncharacterized protein                     | 1 | Short-chain dehydrogenase/reductase<br>SDR  | 0 | cyto      | No  | Oxidoreductase                 |
| A0A1B6HHN6 | Uncharacterized protein                     | 1 | AT hook, DNA-binding motif                  | 0 | nucl      | No  | DNA binding                    |
| A0A1B6HI94 | Uncharacterized protein                     | 1 |                                             | 0 | nucl      | No  |                                |
| A0A1B6HIM1 | Uncharacterized protein                     | 1 | E3 ubiquitin-protein ligase, SMURF1<br>type | 0 | cyto      | No  | ubiquitin protein<br>ligase    |
| A0A1B6HJQ6 | Rap-GAP domain-containing<br>protein        | 1 | Rap GTPase activating protein domain        | 0 | cyto      | No  | Signal transduction<br>protein |
| A0A1B6HRD0 | Uncharacterized protein                     | 1 |                                             | 0 | nucl      | No  |                                |
| A0A1B6HSN9 | Uncharacterized protein                     | 1 | non-motor microtubule binding<br>protein    | 0 | cyto_nucl | No  | microtubule binding            |
| A0A1B6HTU9 | Uncharacterized protein                     | 1 |                                             | 0 | nucl      | No  |                                |
| A0A1B6HUL5 | Uncharacterized protein                     | 1 | Zinc finger C2H2-type                       | 0 | nucl      | No  | nucleic acid binding           |
| A0A1B6HVU0 | Uncharacterized protein                     | 1 |                                             | 0 | mito      | No  |                                |
| A0A1B6HXS5 | Protein kinase domain-containing<br>protein | 1 | Protein kinase domain                       | 0 | cyto      | No  | protein kinase                 |
| A0A1B6I3R8 | Uncharacterized protein                     | 1 |                                             | 0 | nucl      | No  |                                |
| A0A1B6I701 | VWFC domain-containing protein              | 1 | VWFC domain                                 | 0 | nucl      | No  | protein binding                |
| A0A1B6IEA4 | Uncharacterized protein                     | 1 | Signal peptide, PRO_5008584999              | 0 | extr      | Yes | Signal peptide                 |
| A0A1B6IIU7 | Uncharacterized protein                     | 1 |                                             | 0 | nucl      | No  |                                |
| A0A1B6IYH7 | Uncharacterized protein                     | 1 |                                             | 0 | nucl      | No  |                                |
| A0A1B6J5Y8 | Uncharacterized protein                     | 1 |                                             | 0 | mito      | No  |                                |
| A0A1B6J6A8 | Uncharacterized protein                     | 1 |                                             | 0 | nucl      | No  |                                |
| A0A1B6JQC6 | Uncharacterized protein                     | 1 | Zinc finger C2H2-type                       | 0 | nucl      | No  | nucleic acid binding           |
| A0A1B6KM25 | Uncharacterized protein                     | 1 |                                             | 0 | cyto      | No  |                                |
| A0A1B6KWT4 | ASD2 domain-containing protein              | 1 | Apx/Shroom domain ASD2                      | 0 | nucl      | No  | Cytoskeleton protein           |

|            |                                                |   |                                                         |   |      |     |                                     |
|------------|------------------------------------------------|---|---------------------------------------------------------|---|------|-----|-------------------------------------|
| A0A1B6L311 | RRM domain-containing protein                  | 1 | RNA recognition motif. (a.k.a. RRM, RBD, or RNP domain) | 0 | nucl | No  | RNA binding                         |
| A0A1B6L6P4 | Uncharacterized protein                        | 1 |                                                         | 0 | cyto | No  |                                     |
| A0A1B6LH55 | Uncharacterized protein                        | 1 |                                                         | 0 | cyto | No  |                                     |
| A0A1B6LPT6 | Dimer_Tnp_hAT domain-containing protein        | 1 | hAT family C-terminal dimerisation region               | 0 | cyto | No  | Nucleotide metabolism and transport |
| A0A1B6LXQ0 | Uncharacterized protein                        | 1 |                                                         | 0 | extr | No  |                                     |
| A0A1B6MLT4 | Uncharacterized protein                        | 1 | Peptidase M13, domain 2                                 | 1 | E.R. | Yes | metalloendopeptidase                |
| A0A1B6MSI5 | Uncharacterized protein                        | 1 | Heat shock protein Hsp90 family                         | 0 | cyto | No  | Heat shock protein                  |
| A0A220XK81 | Hepatocyte nuclear factor 4                    | 1 | nuclear hormone receptor family                         | 0 | nucl | No  | DNA binding                         |
| A0A482WE63 | FACT complex subunit SSRP1                     | 1 | High mobility group (HMG) box domains                   | 0 | nucl | No  | DNA binding                         |
| A0A482WH06 | PH domain-containing protein                   | 1 | Pleckstrin homology domain                              | 0 | nucl | No  |                                     |
| A0A482WJK3 | Uncharacterized protein                        | 1 | BRCT domain superfamily                                 | 0 | cyto | No  | intracellular signal transduction   |
| A0A482WJW3 | Tet_JBP domain-containing protein              | 1 | Oxygenase domain of the 2OGFeDO superfamily             | 0 | nucl | No  | Oxidoreductase                      |
| A0A482WJY4 | DNA-directed RNA polymerase III subunit RPC6   | 1 | eukaryotic RPC34/RPC39 RNA polymerase subunit family    | 0 | cyto | No  |                                     |
| A0A482WPY7 | Uncharacterized protein                        | 1 | EF-hand domain pair                                     | 1 | cyto | No  |                                     |
| A0A482WQ76 | Uncharacterized protein                        | 1 |                                                         | 1 | extr | Yes |                                     |
| A0A482WWR9 | Uncharacterized protein                        | 1 | Signal peptide, PRO_5019819340                          | 0 | extr | Yes | Signal peptide                      |
| A0A482WXR1 | Uncharacterized protein                        | 1 |                                                         | 0 | cyto | No  |                                     |
| A0A482WZC8 | Uncharacterized protein                        | 1 | Protein transport Sec61-beta/Sbh                        | 1 | nucl | No  | protein transport                   |
| A0A482X2I5 | Uncharacterized protein                        | 1 | Tetratricopeptide-like helical domain superfamily       | 0 | nucl | No  | Protein interaction                 |
| A0A482X370 | Uncharacterized protein                        | 1 | OST-HTH/LOTUS domain                                    | 0 | nucl | No  | RNA binding                         |
| A0A482X7M5 | Anaphase-promoting complex subunit 10          | 1 | APC10 family, multi-subunit E3 protein ubiquitin ligase | 0 | cyto | No  |                                     |
| A0A482X7R4 | G_PROTEIN_RECEP_F1_2 domain-containing protein | 1 | G-protein coupled receptor 1 family                     | 7 | plas | No  |                                     |
| A0A482X7Z5 | Uncharacterized protein                        | 1 |                                                         | 0 | nucl | No  |                                     |

|            |                                               |   |                                                                    |   |           |     |                       |
|------------|-----------------------------------------------|---|--------------------------------------------------------------------|---|-----------|-----|-----------------------|
| A0A482X821 | Uncharacterized protein                       | 1 | TRAFAC class myosin-kinesin ATPase superfamily                     | 0 | nucl      | No  | microtubule binding   |
| A0A482XA40 | Uncharacterized protein                       | 1 | eIF4E, Eukaryotic translation initiation factor 4E binding protein | 0 | nucl      | No  | transporter protein   |
| A0A482XAJ9 | Uncharacterized protein                       | 1 | Optic atrophy 3-like                                               | 0 | E.R._mito | Yes | unknown               |
| A0A482XAR4 | Uncharacterized protein                       | 1 |                                                                    | 0 | mito      | No  |                       |
| A0A482XBD9 | Uncharacterized protein                       | 1 |                                                                    | 0 | nucl      | No  |                       |
| A0A482XCB9 | SAM domain-containing protein                 | 1 | Sterile alpha motif/pointed domain superfamily                     | 1 | cyto      | No  |                       |
| A0A482XEC0 | Uncharacterized protein                       | 1 | SH3-like domain, Sterile alpha motif/pointed domain superfamily    | 0 | nucl      | No  |                       |
| A0A482XFS4 | Uncharacterized protein                       | 1 | AMP-dependent synthetase/ligase                                    | 0 | cyto      | No  |                       |
| A0A482XGW6 | Uncharacterized protein                       | 1 | Zinc finger C2H2-type                                              | 0 | nucl      | No  | nucleic acid binding  |
| A0A482XJS4 | Uncharacterized protein                       | 1 |                                                                    | 0 | cyto      | No  |                       |
| A0A482XKF3 | Ribosomal_L14e domain-containing protein      | 1 | Ribosomal protein L14e domain                                      | 0 | nucl      | No  | Translation           |
| A0A482XL42 | N-acetyltransferase domain-containing protein | 1 | Acyl-CoA N-acyltransferases (Nat )                                 | 0 | mito      | No  | Transferases          |
| A0A482XMX7 | Uncharacterized protein                       | 1 |                                                                    | 0 | nucl      | No  |                       |
| A0A482XN76 | Uncharacterized protein                       | 1 | K Homology domain, type 1 superfamily                              | 0 | cyto      | No  | RNA binding           |
| A0A482XQH2 | Uncharacterized protein                       | 1 |                                                                    | 0 | nucl      | No  |                       |
| A0A482XSJ7 | Uncharacterized protein                       | 1 | Death-like domain superfamily                                      | 0 | cyto      | No  | Cell cycle, Apoptosis |
| B6E9U3     | Odorant binding protein 3                     | 1 | Pheromone/general odorant binding protein superfamily              | 0 | extr      | Yes | odorant binding       |
| G1C2J1     | Tubulin alpha chain                           | 1 | Tubulin/FtsZ, GTPase domain superfamily                            | 0 | cysk      | No  | Cytoskeleton protein  |
| J9ZWA5     | Histone H2A                                   | 1 | C-terminus of histone H2A                                          | 0 | nucl      | No  |                       |



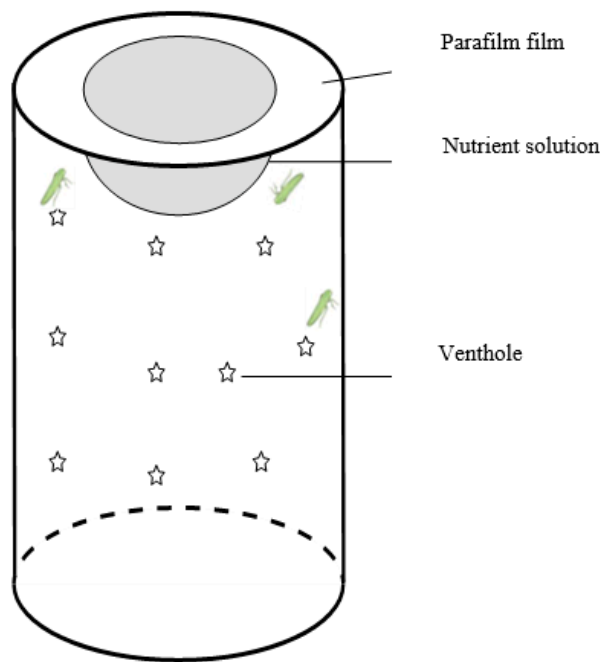

**Figure S1. Schematic diagram of leafhopper saliva collection device (Pan et al., 2021) [28].** Each saliva collection container was placed at one side of sterile glass tube (5.5 cm × 10 cm), and add a layer of Parafilm on the outermost side to prevent leakage, while the opposite end was used to introduce the leafhoppers. After leafhopper introduction, the open end of the glass tube was secured with a piece of cheesecloth and a rubber band. The glass tubes were transferred to chambers maintained at  $25 \pm 2$  °C and  $70 \pm 5\%$  relative humidity, under 14:10 L:D photoperiod.
